# Supplementary material for: Multistep Fractionation of Coal and Application for Graphene Synthesis
Source: PubMed Central journal article supplement — ACS Omega. 2021 Jun 17;6(25):16573–83. doi: 10.1021/acsomega.1c01614 (PMC8246694; doi:10.1021/acsomega.1c01614), 2021-06-17
Supplement: ao1c01614_si_001.pdf [file ao1c01614_si_001.pdf]

## Multistep Fractionation of Coal and Application for Graphene Synthesis

Kaustubh Rane,<sup>1</sup> Jeramie J. Adams,<sup>2</sup> James M. Thode,<sup>3a</sup> Brian M. Leonard,<sup>3</sup> Jianqiang Huo,<sup>2b</sup>

Lamia Goual<sup>1\*</sup>

<sup>1</sup> Department of Petroleum Engineering, University of Wyoming, 1000 E. University Avenue, Laramie, WY 82071

<sup>2</sup> Western Research Institute, 365 N 9<sup>th</sup> St., Laramie, WY 82072

<sup>3</sup> Department of Chemistry, University of Wyoming, 1000 E. University Avenue, Laramie, WY 82071

\* Email: [lgoual@uwyo.edu](mailto:lgoual@uwyo.edu), Phone: (307) 766-3278

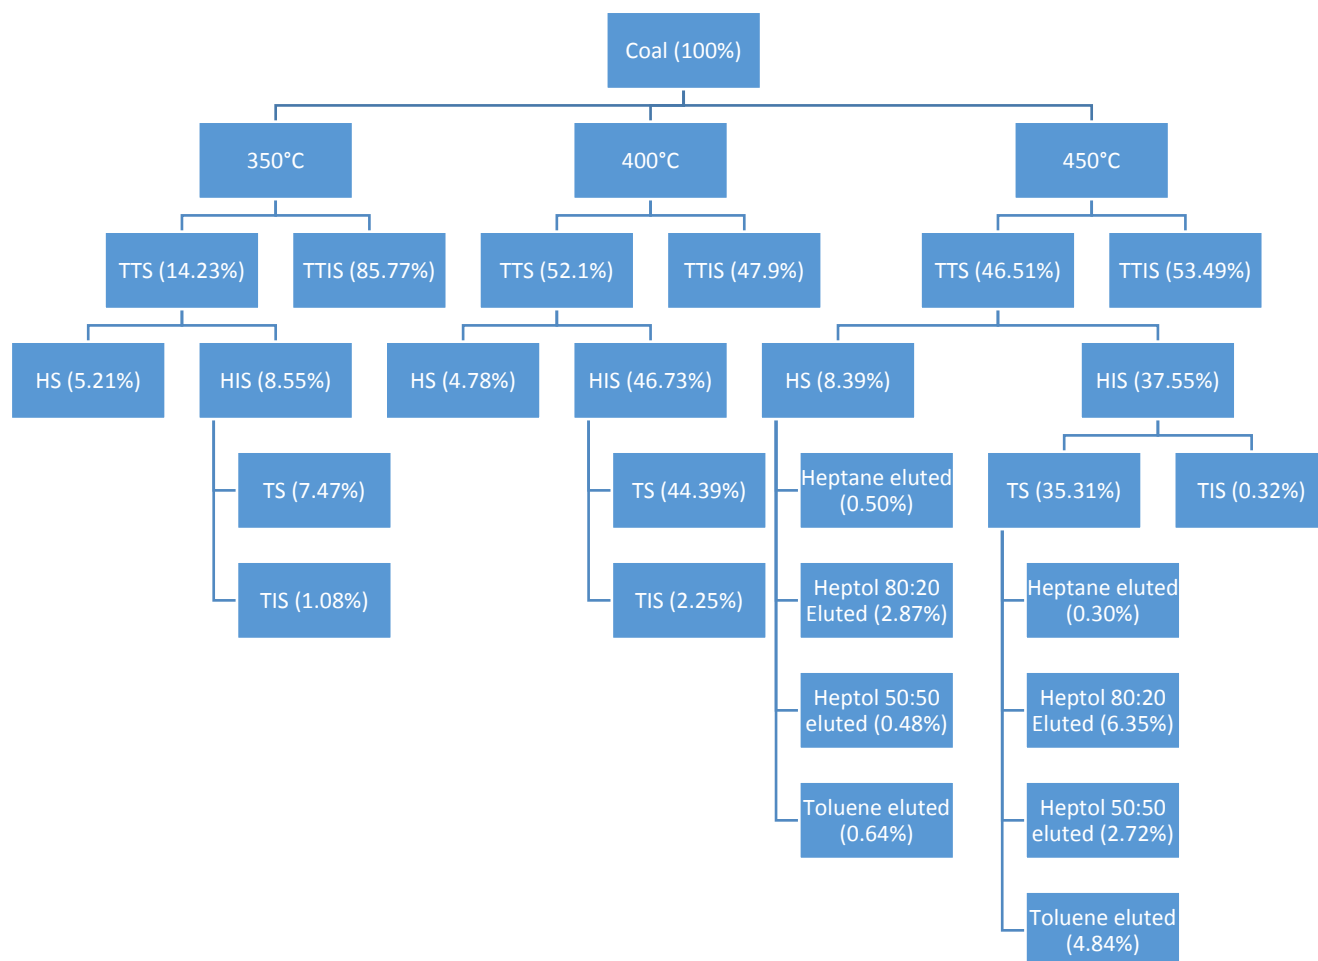

Figure S1: Conversion of the multistep coal fractionation

<sup>a</sup> Anton Paar USA, Inc. - Western Regional Office, 2824 Columbia Street, Torrance, CA 90503

<sup>b</sup> College of Chemistry and Chemical Engineering, Northwest Normal University, 967 Anning E Rd, Lanzhou, Gansu, China
